# Supplementary material for: Effects of Irrigation and Fertilization on the Morphophysiological Traits of Populus sibirica Hort. Ex Tausch and Ulmus pumila L. in the Semiarid Steppe Region of Mongolia
Source: MDPI journal article supplement (doi:10.3390/plants10112407), 2021-11-08
Supplement: s1 [file s1]

**Table S1.** P-values of Two-way ANOVA for treatment effects on growth and morpho-physiological traits of *Populus sibirica* and *Ulmus pumila*

| Species                 | year | Variables                 | Treatments                 | DF | MS          | F Value | Pr>F    |
|-------------------------|------|---------------------------|----------------------------|----|-------------|---------|---------|
| <i>Populus sibirica</i> | 2018 | SLA                       | irrigation                 | 3  | 915.716068  | 28.40   | <0.0001 |
|                         |      |                           | fertilization              | 2  | 300.876691  | 9.33    | 0.0002  |
|                         |      |                           | Irrigation x fertilization | 4  | 16.397573   | 0.51    | 0.7295  |
|                         |      | LA                        | irrigation                 | 3  | 1128.536640 | 10.24   | <0.0001 |
|                         |      |                           | fertilization              | 2  | 921.606120  | 8.36    | 0.0004  |
|                         |      |                           | Irrigation x fertilization | 4  | 155.595581  | 1.41    | 0.2350  |
|                         |      | LB                        | irrigation                 | 3  | 0.07169171  | 5.77    | 0.0011  |
|                         |      |                           | fertilization              | 2  | 0.06597823  | 5.31    | 0.0063  |
|                         |      |                           | Irrigation x fertilization | 4  | 0.01679479  | 1.35    | 0.2554  |
|                         |      | Chlorophyll content total | irrigation                 | 3  | 39.4152069  | 13.23   | <0.0001 |
|                         |      |                           | fertilization              | 2  | 38.0227070  | 12.76   | <0.0001 |
|                         |      |                           | Irrigation x fertilization | 4  | 50.6819682  | 17.01   | <0.0001 |
|                         |      | Chlorophyll a/b ratio     | irrigation                 | 3  | 9.92541782  | 2.45    | 0.0701  |
|                         |      |                           | fertilization              | 2  | 7.76034473  | 1.92    | 0.1544  |
|                         |      |                           | Irrigation x fertilization | 4  | 6.96214996  | 1.72    | 0.1548  |
|                         |      | Water potential (13:00)   | irrigation                 | 3  | 0.03416275  | 3.06    | 0.0914  |
|                         | 2019 | SLA                       | irrigation                 | 3  | 240.7631521 | 3.35    | 0.0218  |
|                         |      |                           | fertilization              | 2  | 149.5014584 | 2.08    | 0.1299  |
|                         |      |                           | Irrigation x fertilization | 4  | 61.1093985  | 0.85    | 0.4963  |
|                         |      | LA                        | irrigation                 | 3  | 0.14923105  | 5.74    | 0.0011  |
|                         |      |                           | fertilization              | 2  | 0.09053664  | 3.48    | 0.0343  |
|                         |      |                           | Irrigation x fertilization | 4  | 0.13100318  | 5.04    | 0.0009  |
|                         |      | LB                        | irrigation                 | 3  | 1829.499087 | 5.80    | 0.0010  |
|                         |      |                           | fertilization              | 2  | 1218.928202 | 3.86    | 0.0239  |
|                         |      |                           | Irrigation x fertilization | 4  | 1189.296191 | 3.77    | 0.0065  |
|                         |      | Chlorophyll content total | irrigation                 | 3  | 137.4831006 | 37.75   | <0.0001 |
|                         |      |                           | fertilization              | 2  | 47.4115287  | 13.02   | <0.0001 |
|                         |      |                           | Irrigation x fertilization | 4  | 51.5728782  | 14.16   | <0.0001 |
|                         |      | Chlorophyll a/b ratio     | irrigation                 | 3  | 0.14451951  | 3.98    | 0.0107  |
|                         |      |                           | fertilization              | 2  | 0.07993435  | 2.20    | 0.1172  |
|                         |      |                           | Irrigation x fertilization | 4  | 0.53869764  | 14.84   | <0.0001 |
|                         |      | Water potential (13:00)   | irrigation                 | 3  | 0.03416275  | 3.06    | 0.0914  |
| <i>Ulmus pumila</i>     | 2018 | SLA                       | irrigation                 | 3  | 554.802018  | 12.79   | <0.0001 |
|                         |      |                           | fertilization              | 2  | 815.337819  | 18.79   | <0.0001 |
|                         |      |                           | Irrigation x fertilization | 4  | 64.052395   | 1.45    | 0.2234  |
|                         |      | LA                        | irrigation                 | 3  | 89.8025298  | 8.07    | <0.0001 |
|                         |      |                           | fertilization              | 2  | 90.5970466  | 8.14    | 0.0005  |
|                         |      |                           | Irrigation x fertilization | 4  | 4.6425834   | 0.38    | 0.8197  |
|                         |      | LB                        | irrigation                 | 3  | 0.00772819  | 6.11    | 0.0007  |
|                         |      |                           | fertilization              | 2  | 0.00704955  | 5.57    | 0.0050  |
|                         |      |                           | Irrigation x fertilization | 4  | 0.00031831  | 0.25    | 0.9081  |
|                         |      | Chlorophyll content total | irrigation                 | 3  | 72.9263154  | 11.45   | <0.0001 |
|                         |      |                           | fertilization              | 2  | 15.3498171  | 2.41    | 0.0963  |
|                         |      |                           | Irrigation x fertilization | 4  | 38.1000451  | 5.98    | 0.0003  |
|                         |      | Chlorophyll a/b ratio     | irrigation                 | 3  | 2.02889914  | 0.96    | 0.4154  |
|                         |      |                           | fertilization              | 2  | 5.60755241  | 2.66    | 0.0764  |

|  |      |                           |                            |   |             |       |         |
|--|------|---------------------------|----------------------------|---|-------------|-------|---------|
|  | 2019 |                           | Irrigation x fertilization | 4 | 8.65418861  | 4.10  | 0.0045  |
|  |      | Water potential (13:00)   | irrigation                 | 3 | 0.02335489  | 0.90  | 0.4817  |
|  |      | SLA                       | irrigation                 | 3 | 835.150788  | 8.01  | <0.0001 |
|  |      |                           | fertilization              | 2 | 1849.083921 | 17.74 | <0.0001 |
|  |      |                           | Irrigation x fertilization | 4 | 1764.802836 | 16.93 | <0.0001 |
|  |      | LA                        | irrigation                 | 3 | 0.00178832  | 1.41  | 0.2446  |
|  |      |                           | fertilization              | 2 | 0.00617236  | 4.86  | 0.0095  |
|  |      |                           | Irrigation x fertilization | 4 | 0.00988866  | 7.78  | <0.0001 |
|  |      | LB                        | irrigation                 | 3 | 59.6299359  | 7.02  | 0.0002  |
|  |      |                           | fertilization              | 2 | 159.2996141 | 18.76 | <0.0001 |
|  |      |                           | Irrigation x fertilization | 4 | 22.2091465  | 2.62  | 0.0390  |
|  |      | Chlorophyll content total | irrigation                 | 3 | 107.2576607 | 17.39 | <0.0001 |
|  |      |                           | fertilization              | 2 | 56.9739893  | 9.24  | 0.0002  |
|  |      |                           | Irrigation x fertilization | 4 | 2.8817998   | 0.47  | 0.7596  |
|  |      | Chlorophyll a/b ratio     | irrigation                 | 3 | 1.58999099  | 8.54  | <0.0001 |
|  |      |                           | fertilization              | 2 | 0.02500083  | 0.13  | 0.8746  |
|  |      |                           | Irrigation x fertilization | 4 | 1.84875884  | 9.93  | <0.0001 |
|  |      | Water potential (13:00)   | irrigation                 | 3 | 0.10895344  | 3.70  | 0.0616  |
